# Supplementary material for: Room Temperature long-wavelength infrared Sensitive Imaging Photodetection based on topological insulator Bi2Te3 nanoflakes
Source: Research Square preprint supplement (doi:10.21203/rs.3.rs-8659972/v1), 2026-01-28
Supplement: Supplementary file 1 [file 53bcaa88d8896171b2039dcc.docx]

**Supporting**

**Room Temperature long-wavelength infrared Sensitive Imaging Photodetection based on topological insulator Bi2Te3 nanoflakes**

Sihang Liu1, Dongbo Wang1, ✉ lijuan Liang7, ✉, Chenchen Zhao2, ✉, Donghao Liu1, Bingke Zhang3, Jingwen Pan9, Xiangqun Chen1, Xuxuan Yang1, Hao Dang1, Dong Li1, Gang Liu4, ✉, Dengkui Wang5, Dan Fang5, Fujun Liu5,✉, Jiamu cao10, Ling Li10, Yufeng Zhang10, Dongwei Jiang6,✉, Xuan Fang5, ✉, Jiehe Sui1, Liancheng Zhao1, Zhichuan Niu6, Jiaqi Zhu8, ✉

1School of Materials Science and Engineering, Harbin Institute of Technology, Harbin 150001, China.

2School of Chemistry and Chemical Engineering, Henan University of Science and Technology, Luoyang, Henan 471023,China

3School of Materials Science and Engineering, University of Jinan, Jinan 250000, China.

4Center for High Pressure Science and Technology Advanced Research Shanghai 201203, China

5Changchun University Science and Technology, Sch Sci, State Key Lab High Power Semicond Lasers, Changchun 130022, People’s Republic of China

6Key Laboratory of Optoelectronic Materials and Devices, Chinese Academy of Sciences, institute of semiconductors, Beijing 100083, China

7Shanghai Institute of Microsystem and Information Technology, Chinese Academy of Sciences, Shanghai 200050, China

8Harbin Inst Technol, Ctr Composite Mat & Struct, Harbin 150080, Peoples R China

9School of Materials Science and Engineering, Henan University of Technology, Zhengzhou 450001, China

10Harbin Inst Technol, Sch Astronaut, Harbin 150001, Heilongjiang, Peoples R China

✉e-mail: wangdongbo@hit.edu.cn; [llj@mail.sim.ac.cn](mailto:llj@mail.sim.ac.cn); [cczhaophd@haust.edu.cn](mailto:cczhaophd@haust.edu.cn); liugang@hpstar.ac.cn; [fjliu@cust.edu.cn](mailto:fjliu@cust.edu.cn); [jdw@semi.ac.cn](mailto:jdw@semi.ac.cn); fangx@cust.edu.cn; zhujq@hit.edu.cn

**Appendix 1:** Calculation of single-particle eigen-energy and eigen-wavefunction from a tight-binding model

With the energies and wavefunctions obtained from DFT calculation, we develop a tight-binding (TB) model using the Wannier90 package [Mostofi A A, Yates J R, Pizzi G, Lee Y-S, Souza I, Vanderbilt D and Marzari N 2014 *Computer Physics Communications* **185** 2309-10]. This maps the ground-state wave functions from the plane wave basis set onto a maximally localized Wannier function basis , where is the composite index of the atomic orbit of an atom with atom site ***R***. ***R*** = ***R****a****a***+ ***R****b****b***+ ***R****c****c*** is the Bravais lattice vector with **R**a/b/c being the Bravais lattice vector component in the direction of the unit cell lattice vector **a/b/c**. The Bloch function of TB model is thus given by:

(A1)

and elements of the TB Hamiltonian *HTB* are given by:

(A2)

where are the matrix element extracted from the Wannier90 output file, with *HKS* being the Hamiltonian of the Kohn-Sham equation.

**Appendix 2:** Calculation of excitonic bandstructure

With single-particle eigenvalues and wavefunctions of the single particle from TB model, we calculate excitonic states through many-body problem using Bethe–Salpeter equation (BSE) [Cutkosky R E 1954 *Phys Rev* **96** 1135-41; Carbonell J and Karmanov V A 2010 *The European Physical Journal A* **46** 387-97]. An exciton state is a coherent superposition of hole (with crystal momentum k) and electron (with crystal momentum ) states from band-pairs (υ, c) in the reciprocal space and can be written as:

(A3)

where *S* and ***Q*** are the exciton band index and the center-of-mass momentum, respectively, and is the coordinate. The exciton eigenvalue problem in the basis displayed in Eq. [(A3)](#bookmark1) leads to the following BSE:

(A4)

where is the total area of the crystal, with and being the lattice constant, is the eigenvalue of TB model with the momentum, represents the matrix element of the many-body Coulomb potential including direct and exchange terms, and is the exciton energy of the *S*th state with the center-of-mass momentum ***Q***.

To simplify the calculation, we apply the Tamm-Dancoff approximation [ So Hirata and Head-Gordon M 1999 *Chem Phys Lett* **314** 291-299] to the many-body Coulomb potential, which neglects the orbital character of the Coulomb interaction. In this case and are given by

(A5)

and

(A6)

with

(A7)

where is the vacuum/effective dielectric constant, and represents a characteristic length.

**Appendix 3:** Calculations of the surface local density of states.(LDOS) of related energy spectrum

To investigate the superconducting or magnetic proximity effects in Bi₂Te₃ crystals, it is necessary to adopt open boundary conditions to model the material’s surface or interface. For convenience, the three-dimensional vector ***R*** is decomposed into a longitudinal component , perpendicular to the material surface, and a transverse component , parallel to the surface. After applying open boundary conditions along the direction, a two-dimensional thin-film system is formed, in which only the in-plane direction remains periodic.

In general, experimentally cleavable planes often conflict with the primitive lattice vectors obtained from first-principles calculations. Therefore, it becomes necessary to redefine the basis vectors ***R*′**₁, ***R*′**₂, and ***R*′**₃ as follows:

***R***′1 = *U*11***R***1 + *U*12***R***2 + *U*13***R***3

***R***′2 = *U*21***R***1 + *U*22***R***2 + *U*23***R***3

***R***′3 = *U*31***R***1 + *U*32***R***2 + *U*33***R***3 (A8)

where ***R*′**₁ and ***R*′**₂ form the transverse vector , while ***R*′**₃ corresponds to . Using the basis vector transformation matrix **U**, the physical properties of arbitrary cleavage surfaces can be systematically studied.

In this project, the Hamiltonian of the resulting two-dimensional Bi₂Te₃ crystal is obtained by imposing open boundary conditions along the ***R*′**₃ direction and performing a Fourier transform along the periodic directions:

(A9)


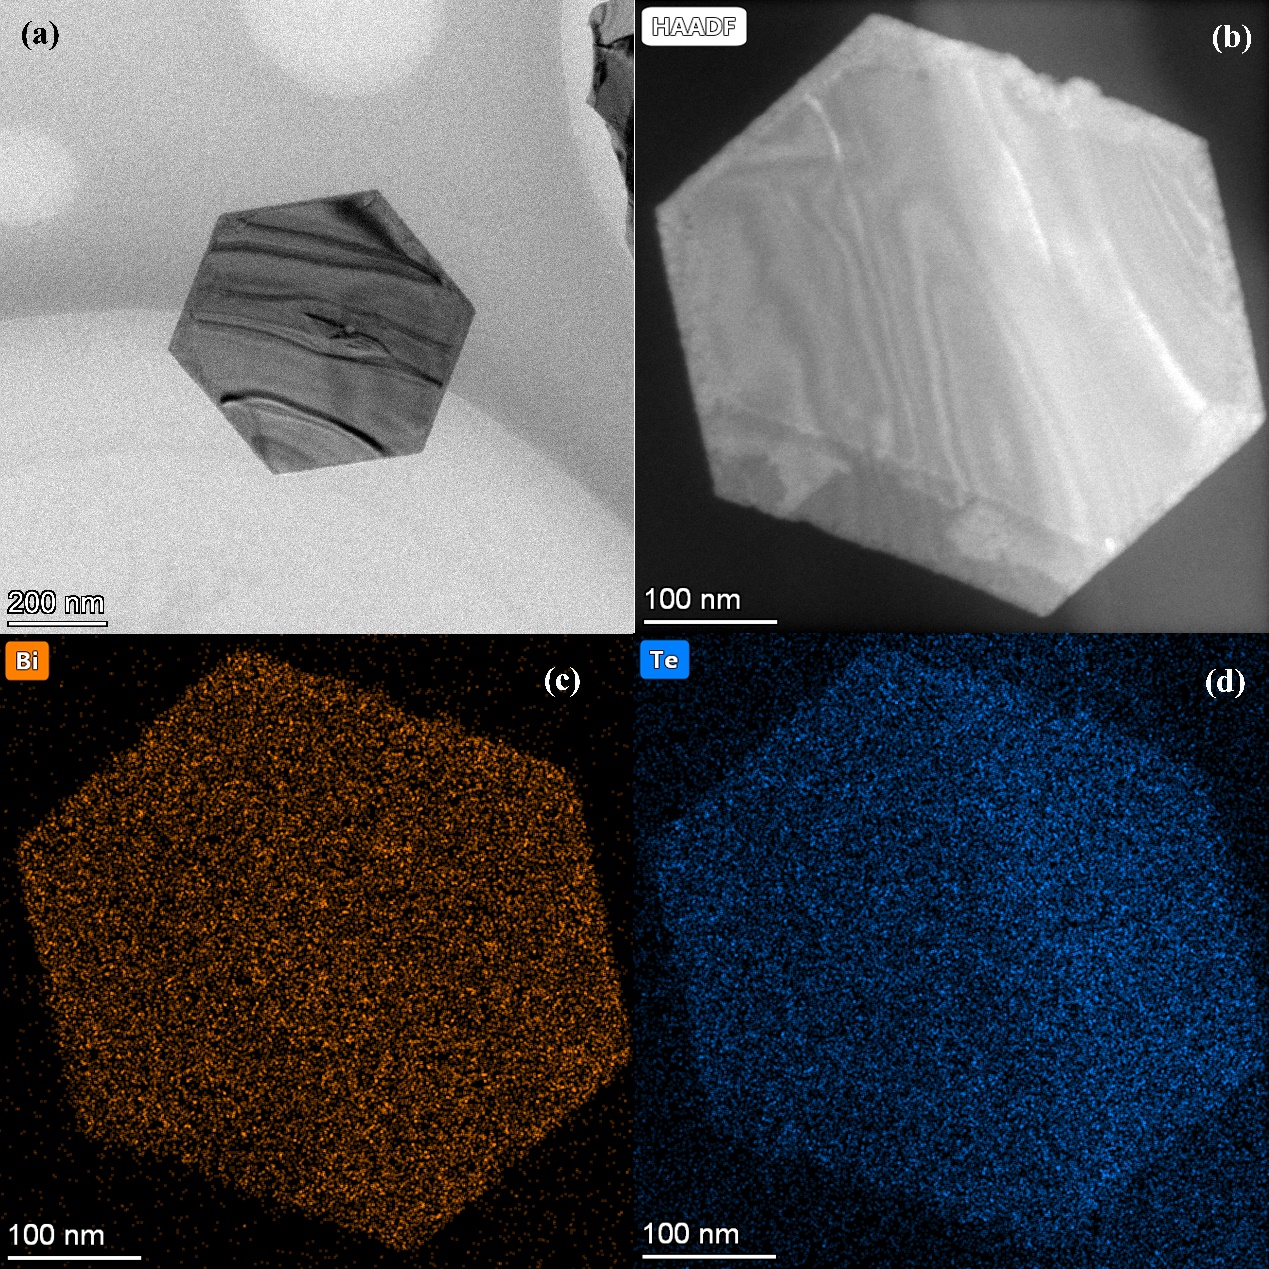


Figure S1 (a, b)TEM and (c, d) multi-element mappings of the synthesis samples of Bi2Te3.


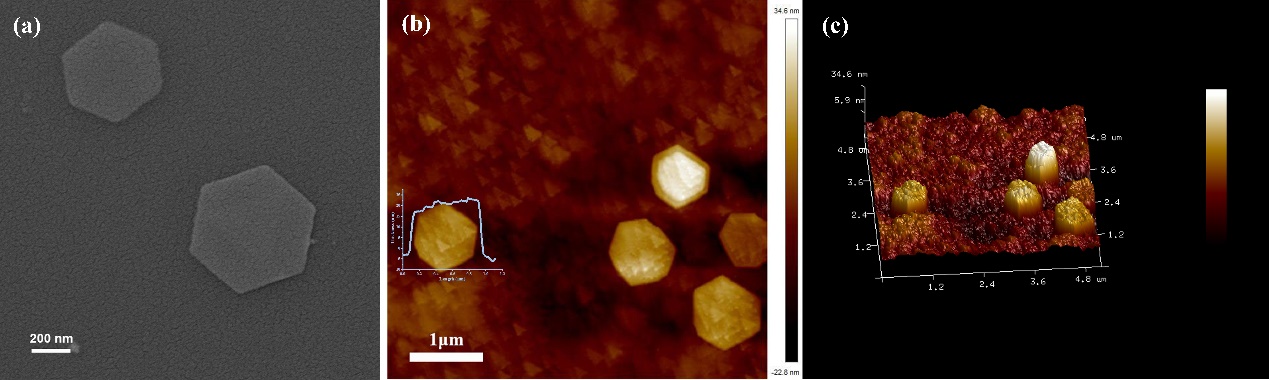


Figure S2 (a)SEM and (b, c) AFM of the synthesis samples of Bi2Te3.


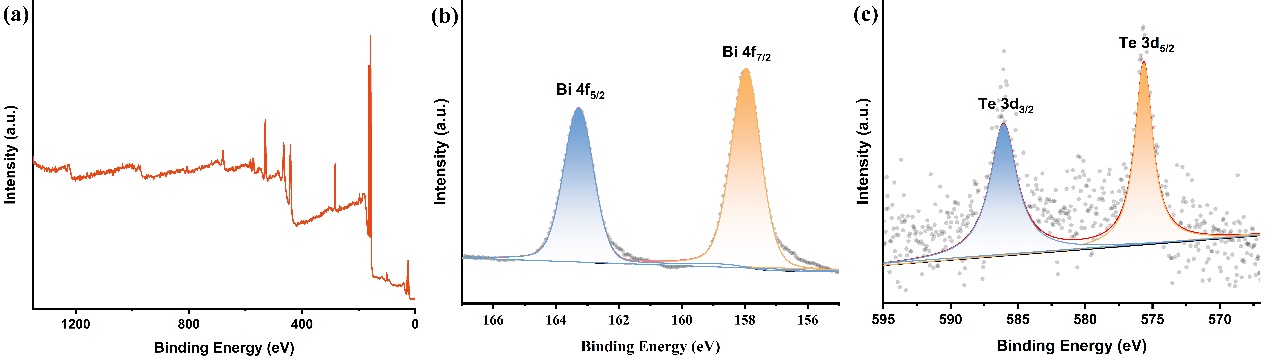


Figure S3 (a) XPS survey of Bi2Te3. (b, c) XPS fine spectra of elemental Bi and Te in Bi2Te3.


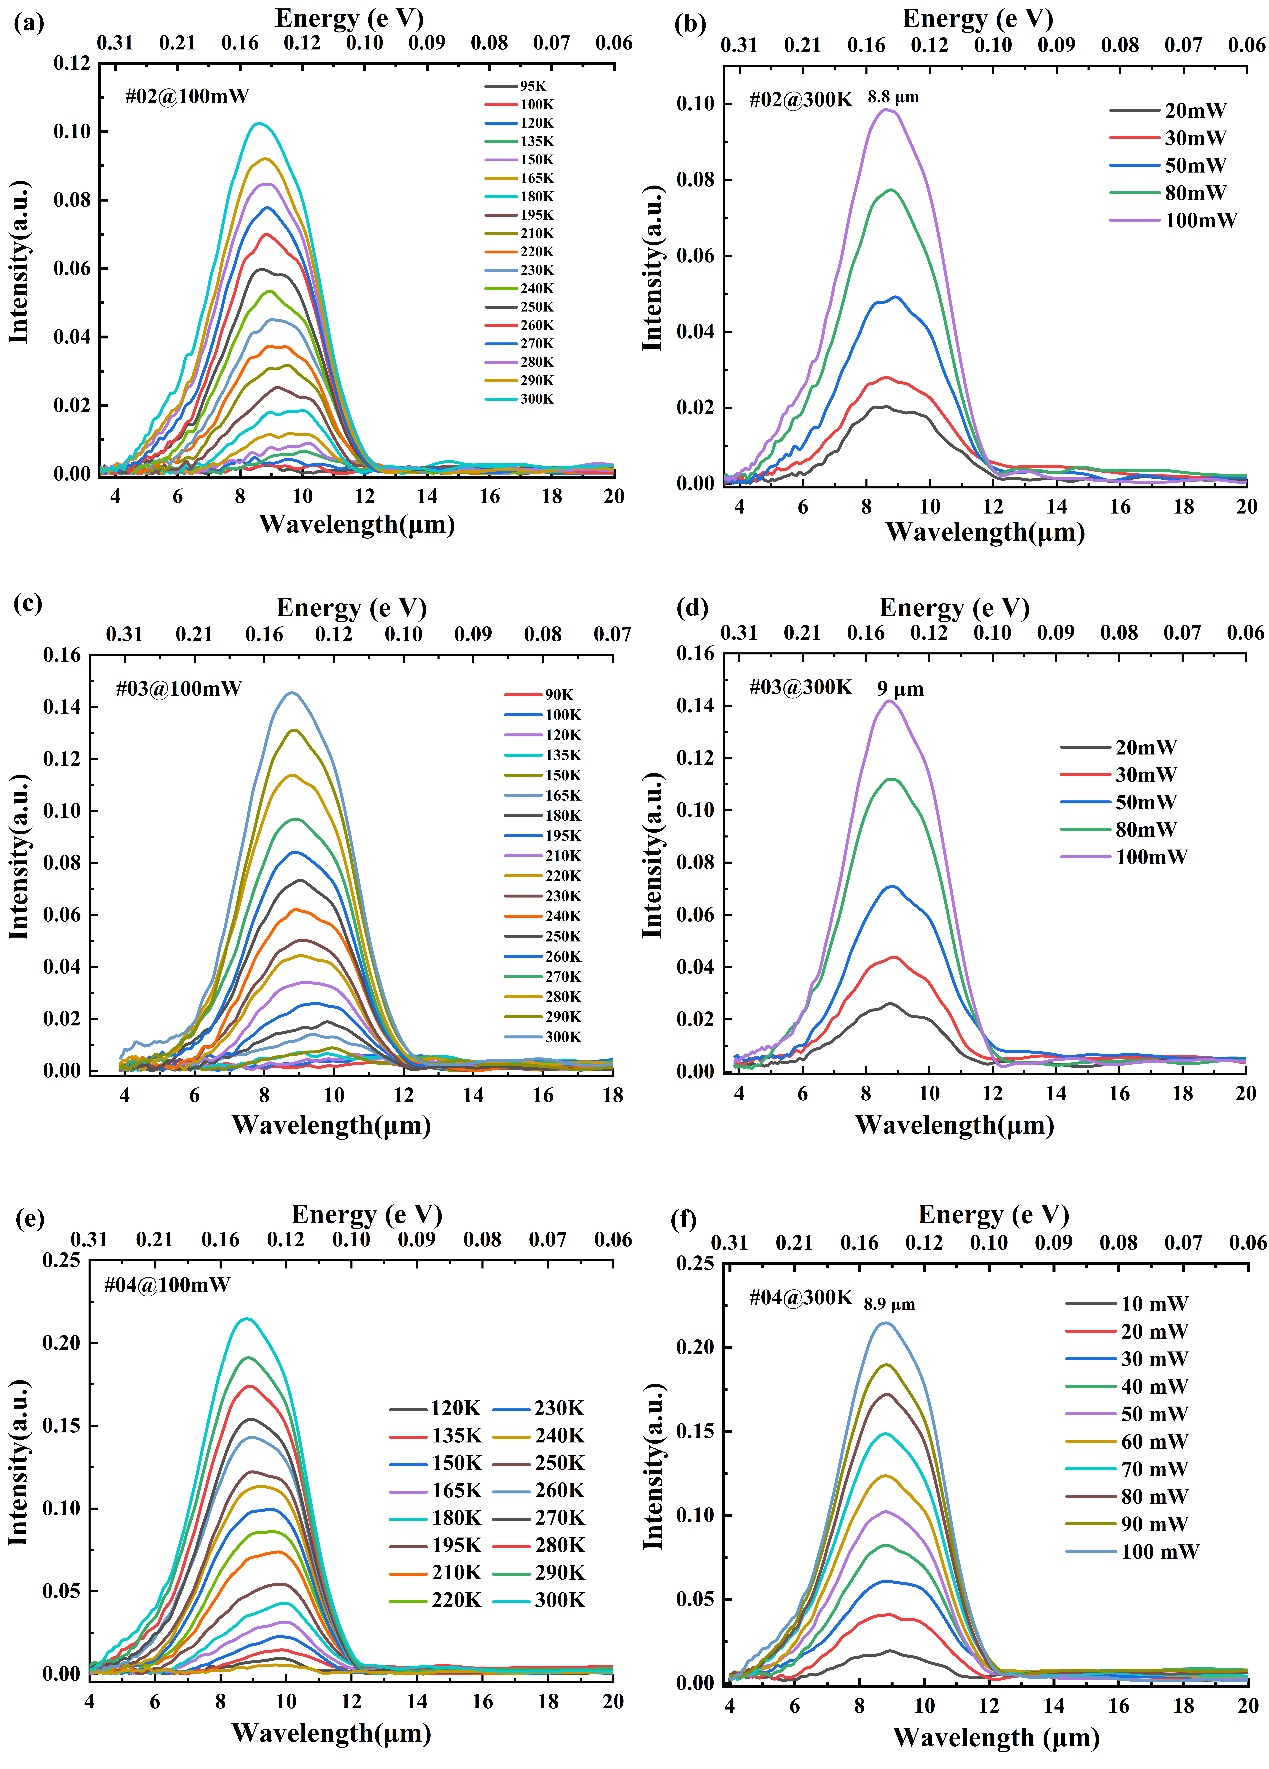


Figure S4 (a, c, e) Variable temperature PL of Bi2Te3 and (b, d, f) Variable power PL of Bi2Te3 which be prepared in different batches.


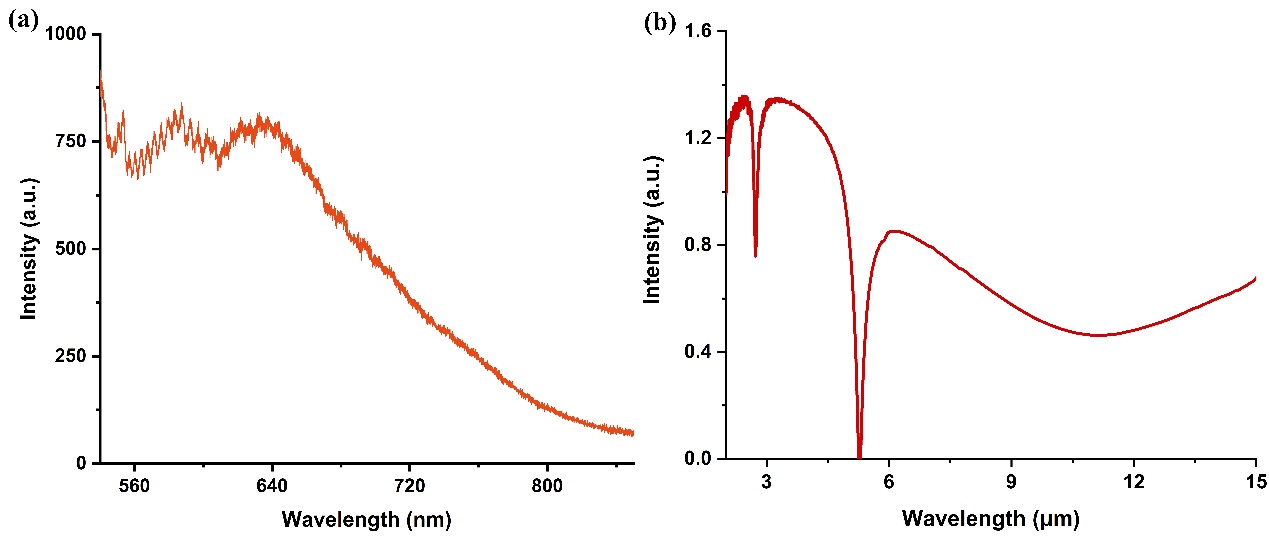


Figure S5 Absorption spectra of Bi2Te3 (a) in the visible light and (b) in the infrared light.


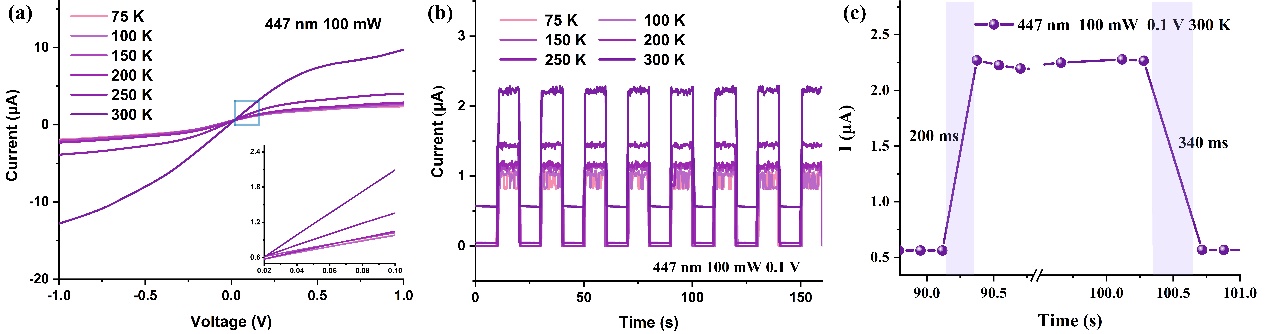


Figure S6 Under the excitation of a 447 nm laser (a) I-V characteristics. (b) photocurrent response of the Bi2Te3-based device. (c) Response time characteristics of the device.


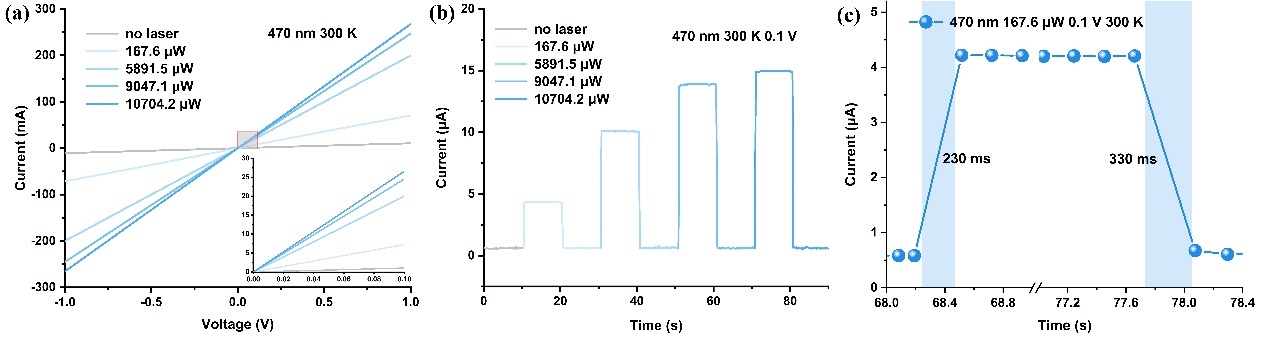


Figure S7 Under the excitation of a 470 nm laser (a) I-V characteristics. (b) photocurrent response of the Bi2Te3-based device. (c) Response time characteristics of the device.


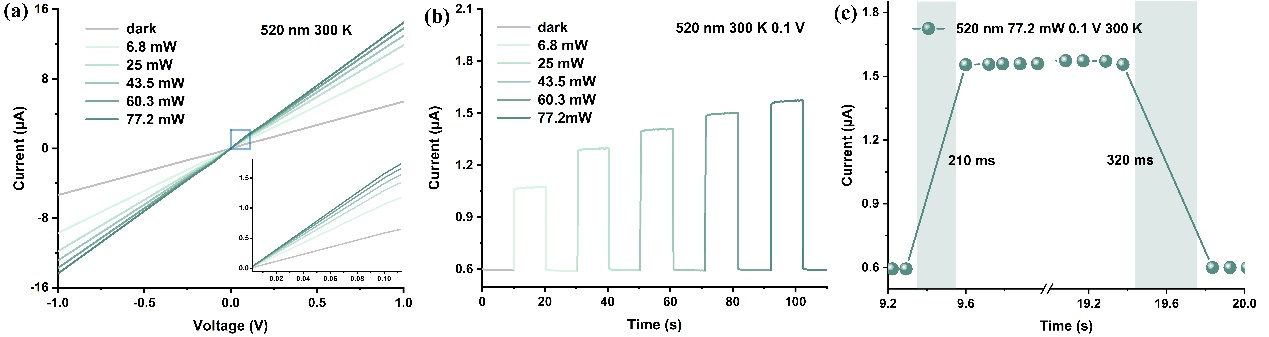


Figure S8 Under the excitation of a 520 nm laser (a) I-V characteristics. (b) photocurrent response of the Bi2Te3-based device. (c) Response time characteristics of the device.


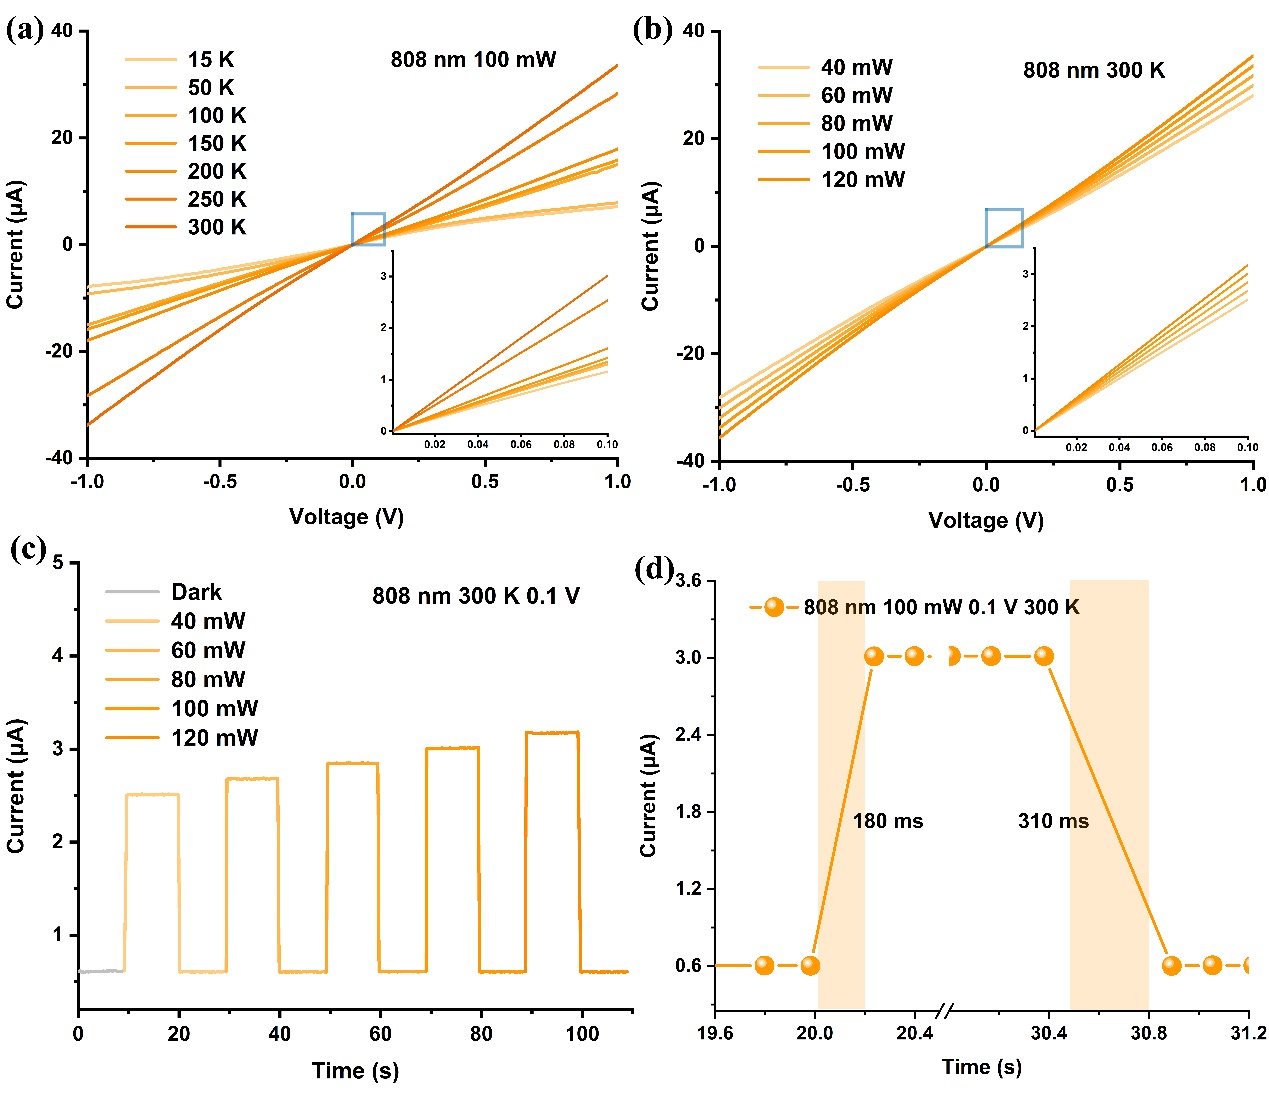


Figure S9 Under the excitation of a 808 nm laser (a) I-V characteristics at different temperature. (b) I-V characteristics at different power. (c) Photocurrent response of the Bi2Te3-based device. (d) Response time characteristics of the device.


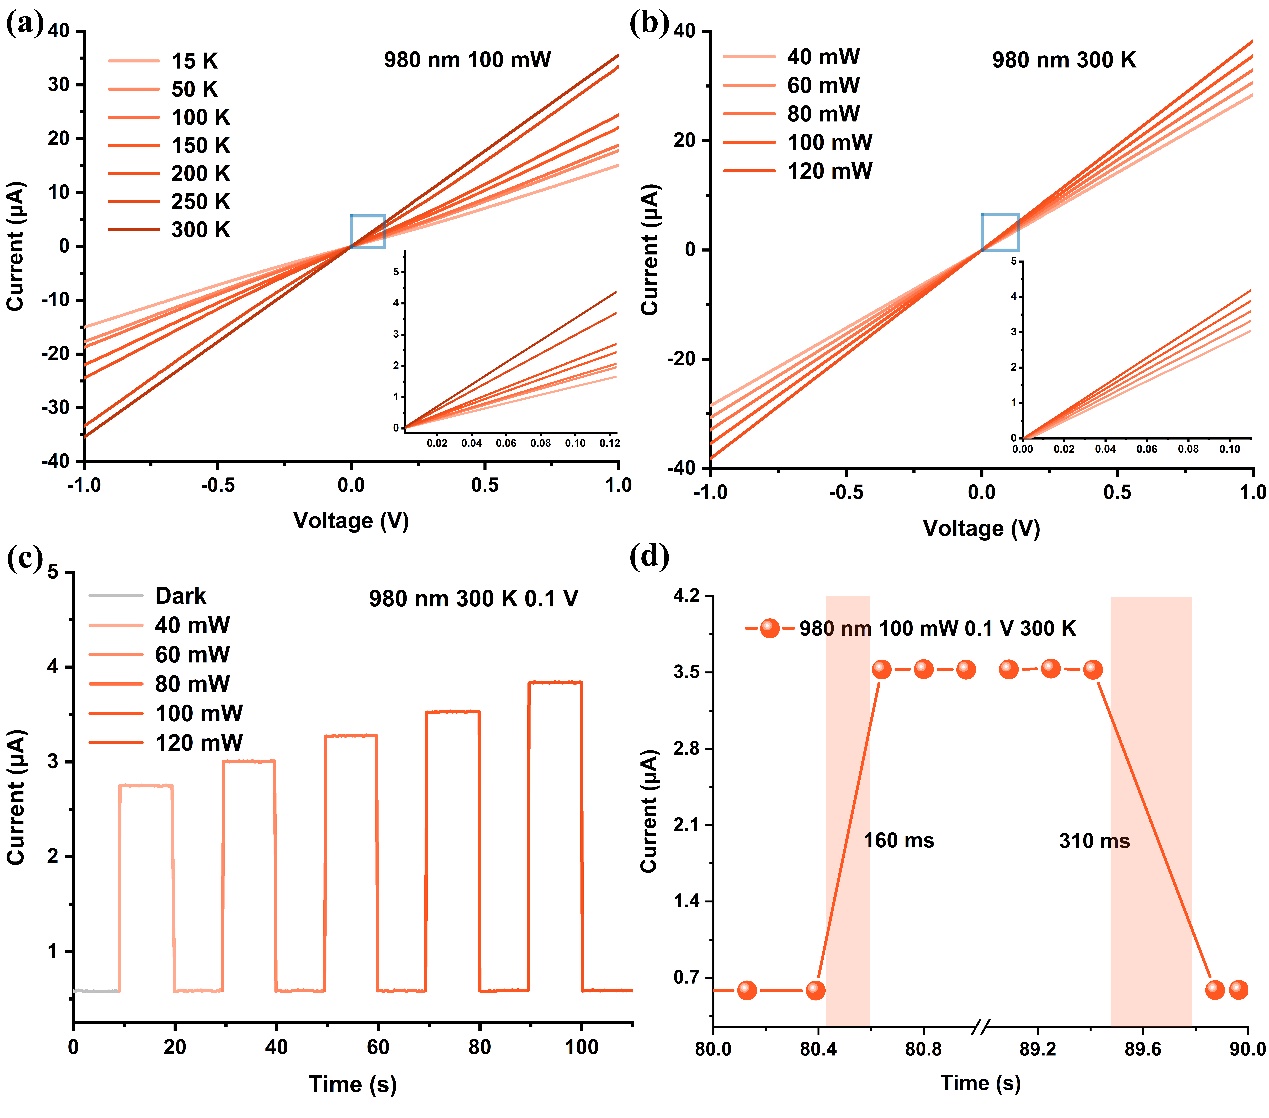


Figure S10 Under the excitation of a 980 nm laser (a) I-V characteristics at different temperature. (b) I-V characteristics at different power. (c) Photocurrent response of the Bi2Te3-based device. (d) Response time characteristics of the device.


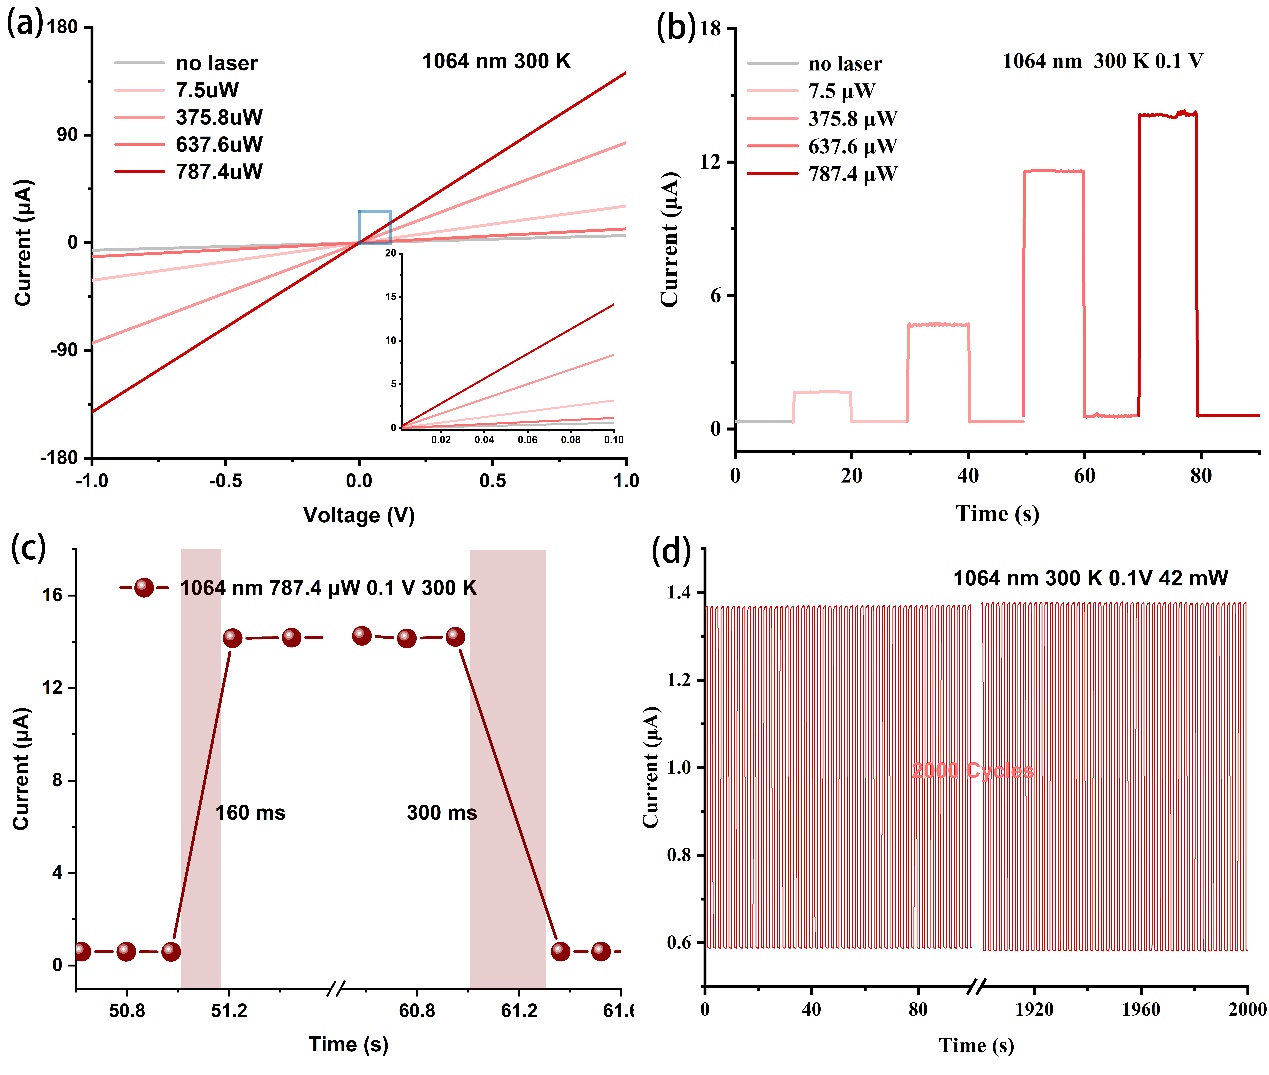


Figure S11 Under the excitation of a 1064 nm laser (a) I-V characteristics. (b) Photocurrent response of the Bi2Te3-based device. (c) Response time characteristics of the device. (d) Cycling test of photocurrent response.

Table S1 The on/off ratio, *Ri*, *D** and *EQE* values of each laser at different temperatures.

| Laser | Temperature (K) | on/off ratio | *Ri* (mA/W) | *D** (Jones) | *EQE* (%) |
| --- | --- | --- | --- | --- | --- |
| 447 nm  100 mW  0.1 V | 75 | 1844 | 5.75938E-5 | 1.82127E9 | 6.75029E-4 |
| 100 | 2060 | 6.43438E-5 | 2.03473E9 | 7.54142E-4 |
| 150 | 2280 | 7.12188E-5 | 2.25213E9 | 8.34721E-4 |
| 200 | 236 | 7.34375E-5 | 7.34375E8 | 8.60726E-4 |
| 250 | 30.20833 | 8.7625E-5 | 2.82808E8 | 1.02701E-3 |
| 300 | 3.98214 | 1.04375E-4 | 9.86251E7 | 1.22333E-3 |
| 808 nm  100 mW  0.1 V | 15 | 13008.13008 | 9.99923E-5 | 6.37528E9 | 1.17196E-3 |
| 50 | 9847.32824 | 8.06168E-5 | 4.98052E9 | 9.44871E-4 |
| 100 | 9310.34483 | 8.43659E-5 | 4.95414E9 | 9.88813E-4 |
| 150 | 2572.46377 | 8.87155E-5 | 2.67002E9 | 1.03979E-3 |
| 200 | 309.61538 | 1.003E-4 | 9.83522E8 | 1.17557E-3 |
| 250 | 27.74123 | 1.52425E-4 | 3.56898E8 | 1.7865E-3 |
| 300 | 5.01661 | 1.51125E-4 | 1.37728E8 | 1.77126E-3 |
| 980 nm  100 mW  0.1 V | 15 | 12053.57143 | 8.4368E-5 | 5.63707E9 | 9.88837E-4 |
| 50 | 12248.06202 | 9.87419E-5 | 6.1474E9 | 1.15731E-3 |
| 100 | 11586.2069 | 1.04991E-4 | 6.16528E9 | 1.23055E-3 |
| 150 | 3955.82329 | 1.23094E-4 | 3.90038E9 | 1.44272E-3 |
| 200 | 479.21225 | 1.36589E-4 | 1.42871E9 | 1.6009E-3 |
| 250 | 34.97653 | 1.80925E-4 | 4.38292E8 | 2.12053E-3 |
| 300 | 6.05128 | 1.84688E-4 | 1.70744E8 | 2.16463E-3 |

Table S2 The on/off ratio, *Ri*, *D** and EQE values of each laser at different power.

| Laser | Power density | on/off ratio | *Ri* (mA/W) | *D** (Jones) | *EQE* (%) |
| --- | --- | --- | --- | --- | --- |
| 470 nm  300 K  0.1 V | 167.6 μW | 7.21667 | 0.1391 | 1.26977E11 | 1.63 |
| 5891.5 μW | 16.71667 | 0.01 | 9.1322E9 | 0.117 |
| 9047.1 μW | 23.15 | 0.00918 | 8.38118E9 | 0.108 |
| 10704.2 μW | 24.91667 | 0.00838 | 7.64869E9 | 9.8203E-2 |
| 520 nm  300 K  0.1 V | 6.8 mW | 1.78333 | 4.31985E-4 | 3.94347E8 | 5.06309E-3 |
| 25 mW | 2.16667 | 1.75E-4 | 1.59752E8 | 2.05109E-3 |
| 43.5 mW | 2.35 | 1.16379E-4 | 1.06239E8 | 1.36403E-3 |
| 60.3 mW | 2.5 | 9.32836E-5 | 8.51559E7 | 1.09333E-3 |
| 77.2 mW | 2.61667 | 7.85298E-5 | 7.16876E7 | 9.2041E-4 |
| 808 nm  300 K  0.1 V | 40 mW | 4.16667 | 2.96875E-4 | 2.71009E8 | 3.47953E-3 |
| 60 mW | 4.46667 | 2.16667E-4 | 1.97789E8 | 2.53945E-3 |
| 80 mW | 4.73333 | 1.75E-4 | 1.59752E8 | 2.05109E-3 |
| 100 mW | 5.01667 | 1.50625E-4 | 1.37501E8 | 1.7654E-3 |
| 120 mW | 5.3 | 1.34375E-4 | 1.22667E8 | 1.57494E-3 |
| 980 nm  300 K  0.1 V | 40 mW | 4.58333 | 3.35937E-4 | 3.06668E8 | 3.93736E-3 |
| 60 mW | 5 | 2.5E-4 | 2.28218E8 | 2.93013E-3 |
| 80 mW | 5.46667 | 2.09375E-4 | 1.91132E8 | 2.45398E-3 |
| 100 mW | 5.88333 | 1.83125E-4 | 1.67169E8 | 2.14632E-3 |
| 120 mW | 6.41667 | 1.69271E-4 | 1.54522E8 | 1.98394E-3 |
| 1064 nm  300 K  0.1 V | 7.5 μW | 4.1 | 3.35937E-4 | 1.1553E12 | 12.111 |
| 375.8μW | 11.75 | 2.5E-4 | 7.99552E10 | 0.838 |
| 637.6μW | 19.33333 | 2.09375E-4 | 9.84314E10 | 1.264 |
| 787.4μW | 23.66667 | 1.83125E-4 | 9.85446E10 | 1.265 |
| 10.6 μm  300 K  1 V | 60 mW | 1.86408 | 0.00221 | 3.1503E8 | 2.58462E-2 |
| 80 mW | 1.89879 | 0.00173 | 2.46763E8 | 2.03278E-2 |
| 100 mW | 1.93952 | 0.00146 | 2.07612E8 | 1.7068E-2 |
| 120 mW | 1.94444 | 0.00124 | 1.74607E8 | 1.45286E-2 |
| 140 mW | 1.95402 | 0.00111 | 1.53857E8 | 1.30286E-2 |
| 160 mW | 2.04183 | 0.00107 | 1.47577E8 | 1.25446E-2 |


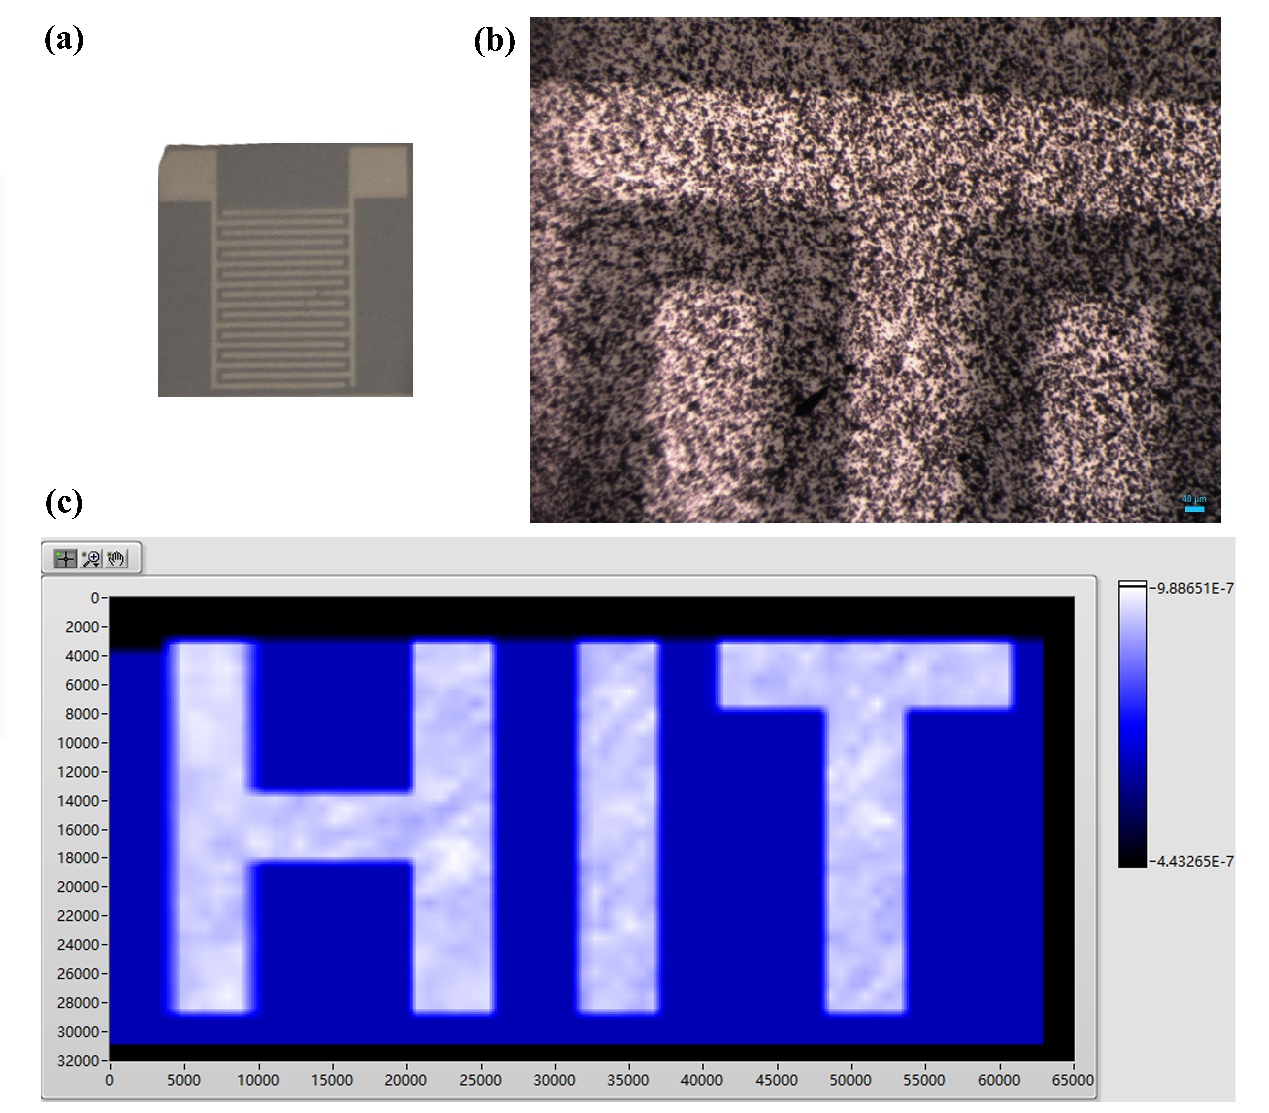


Figure S11 Picture of the Bi2Te3-based device. (b) Optical photograph of the electrode. (c) “HIT” pixel images under the excitation of a 1064 nm laser.


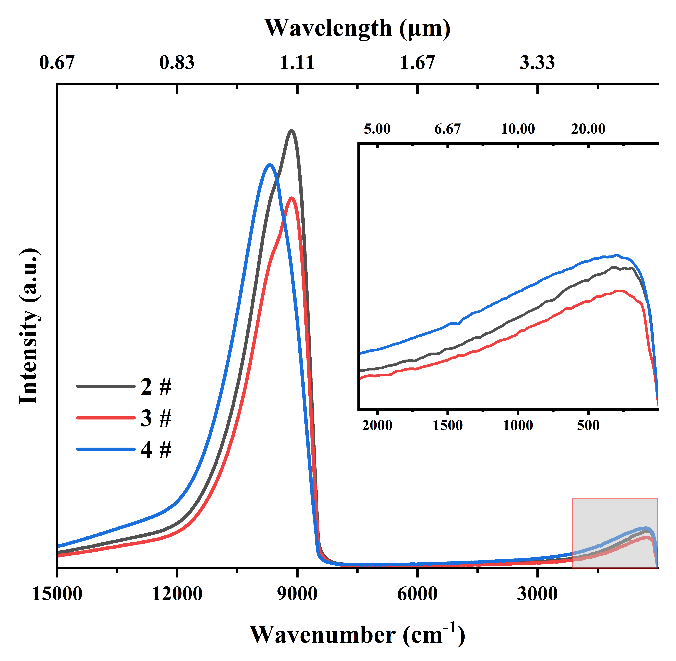


Figure S12 Response spectrum.


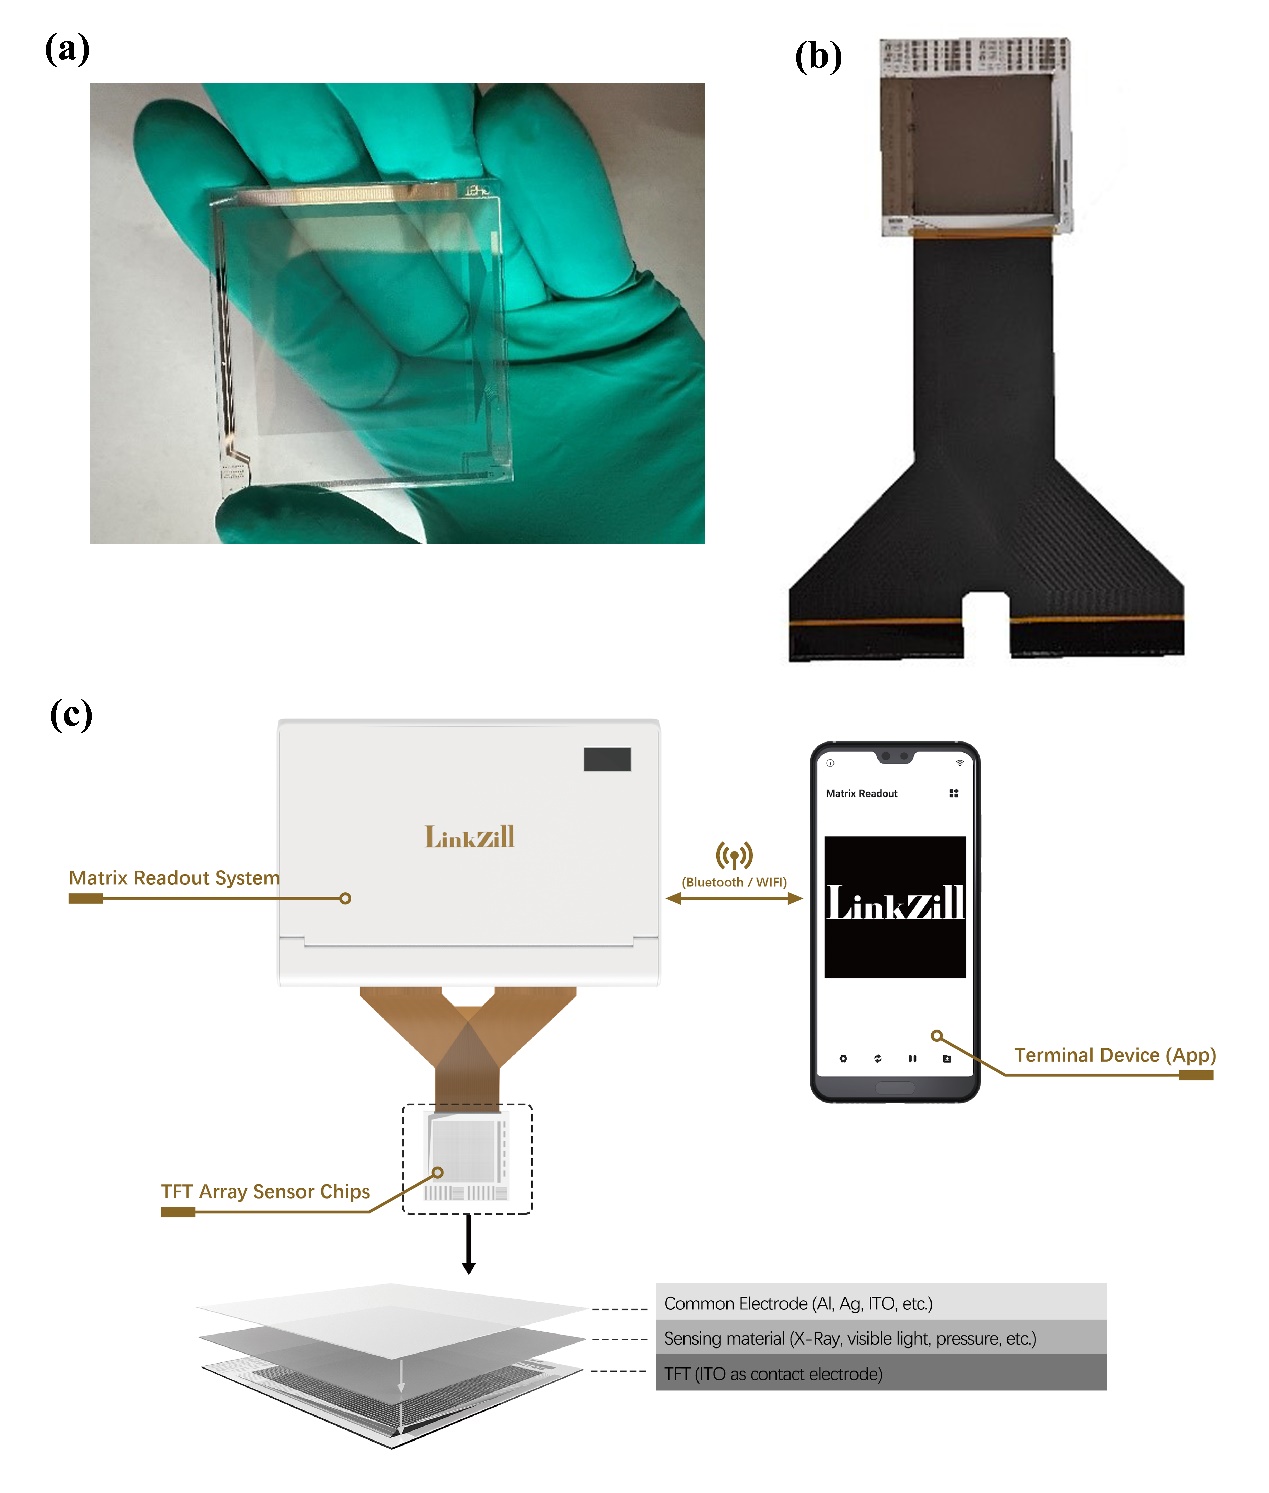


Figure S13 (a) Picture of the Bi2Te3-based 64×64 focal plane array. (b) Picture of the Bi2Te3-based 64×64 focal plane device. (c) Imaging system under the excitation of visible light.

Video S1 Imaging process under the excitation of visible light.
